# Supplementary material
Source: Research Square preprint supplement (doi:10.21203/rs.3.rs-9160880/v1)
Supplement: Supplementary file 1 [file 4db667d9f234f5f19b482288.docx]

Supplementary materials


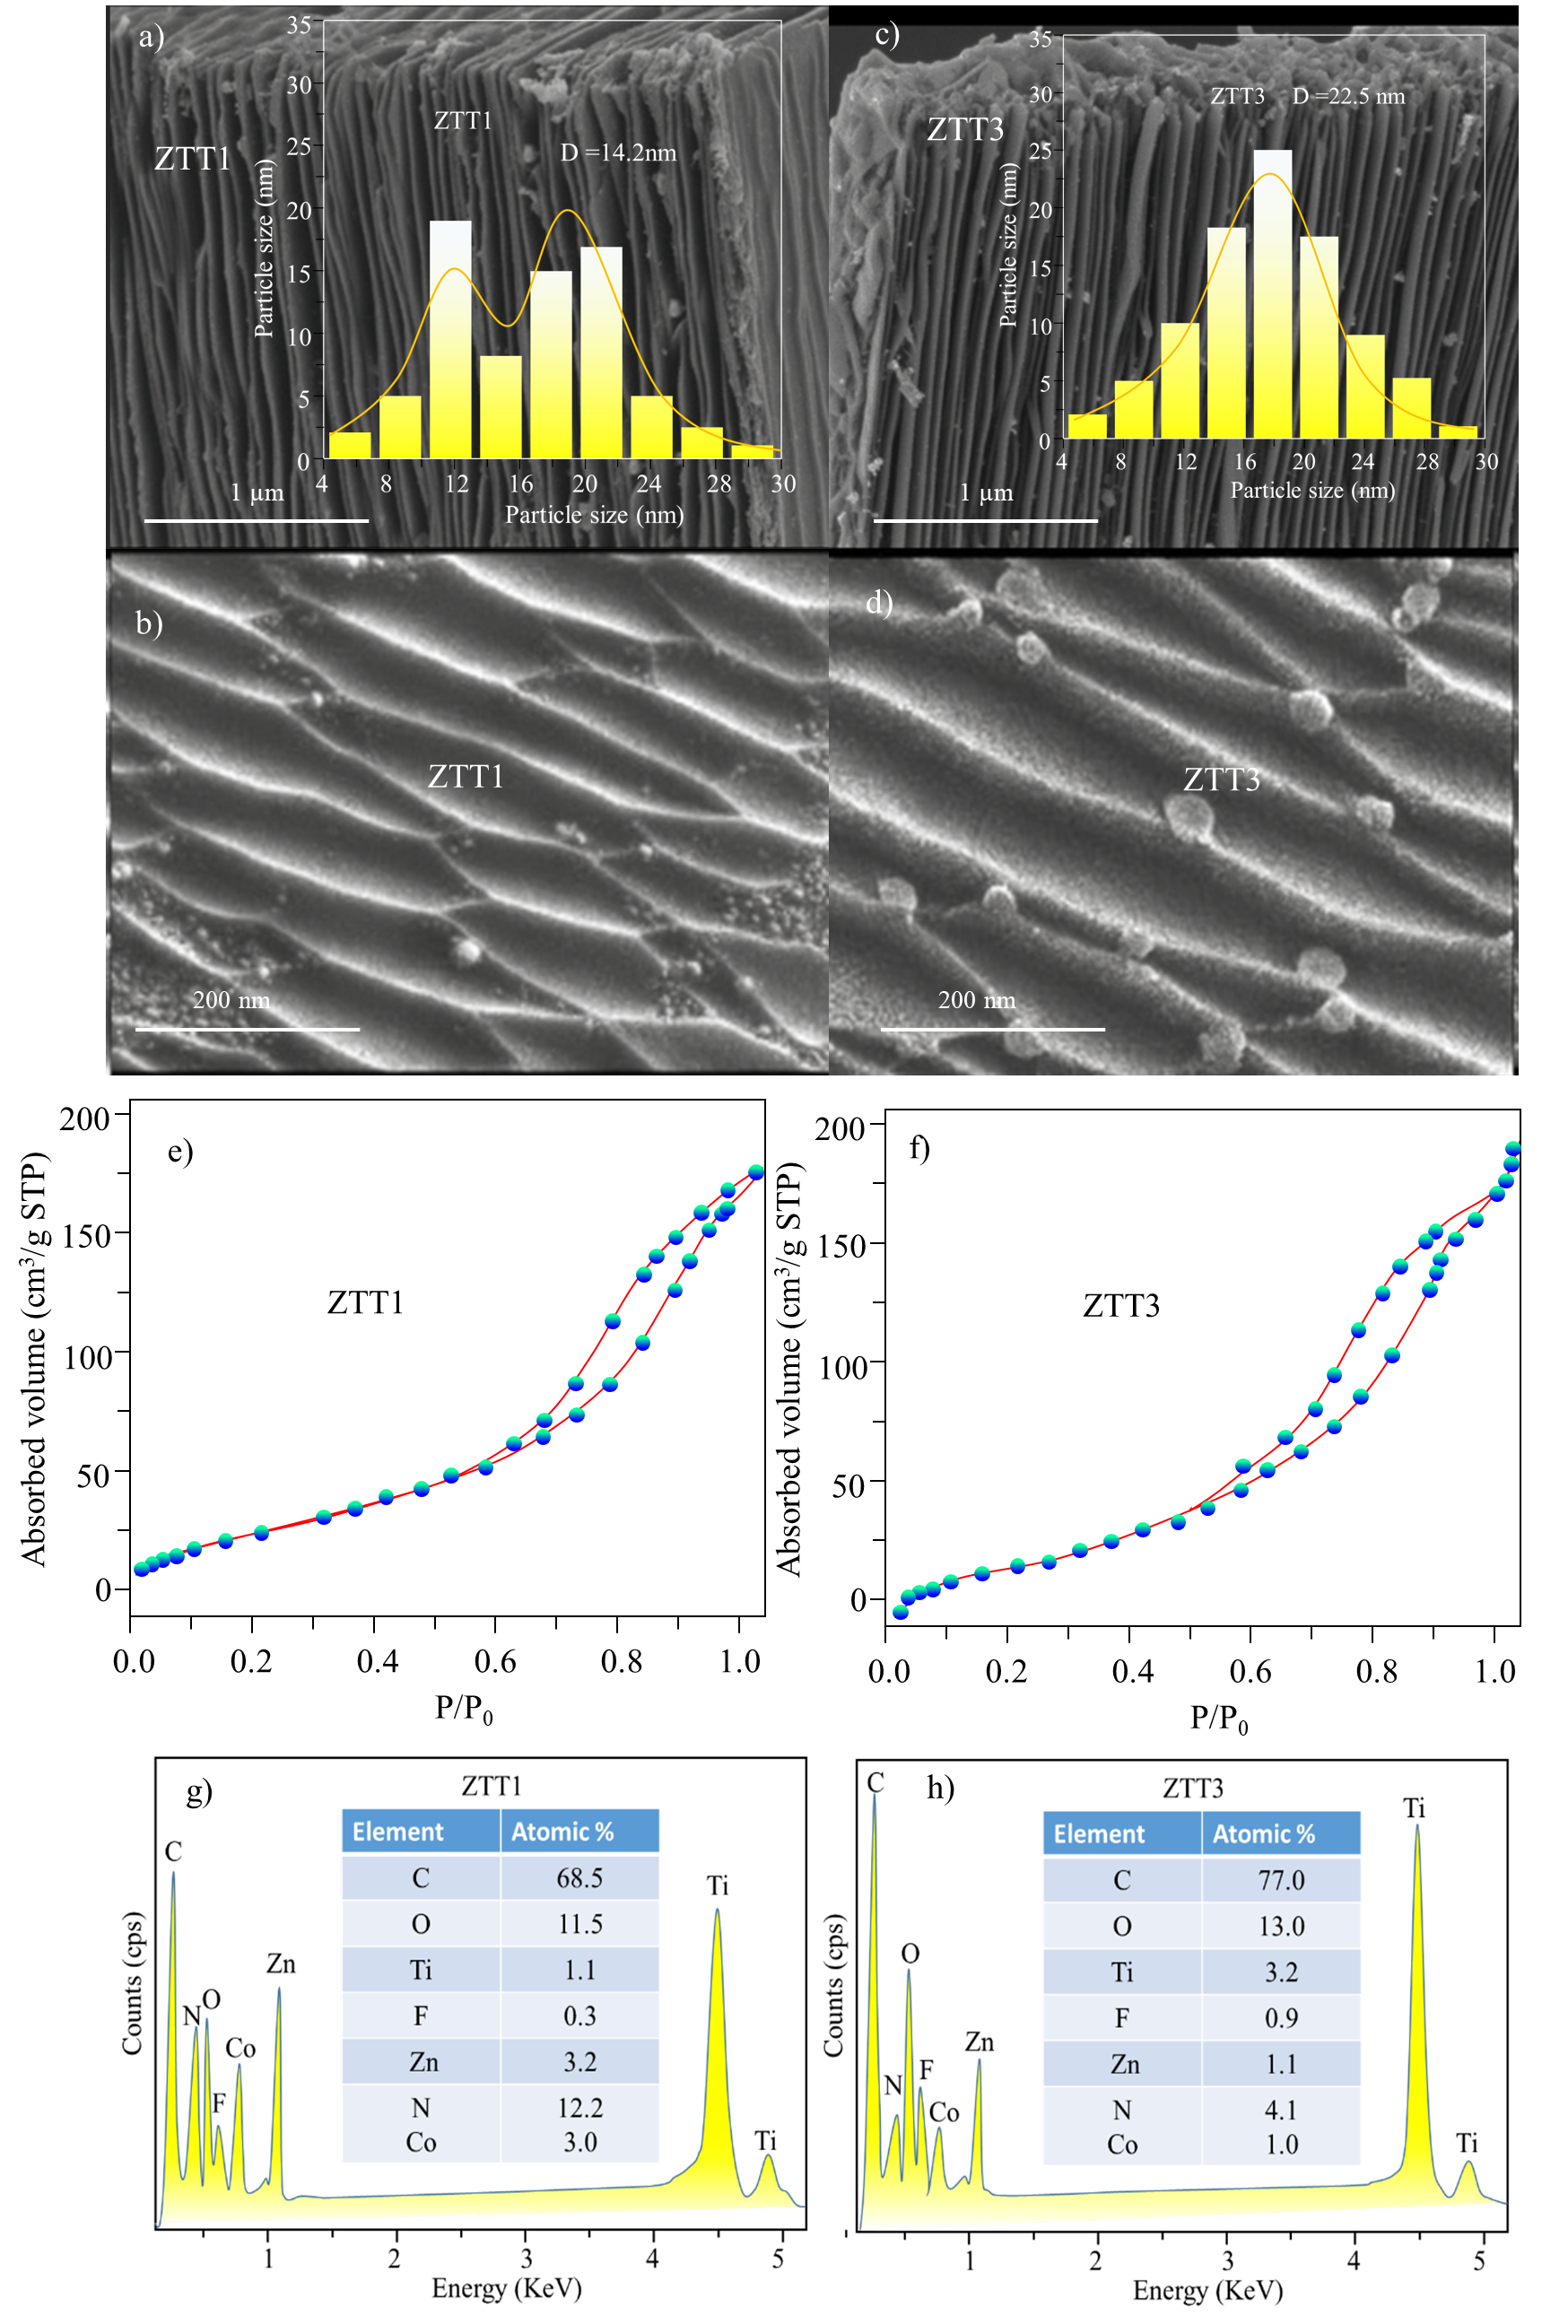


Fig.S1-SEM image of ZTT1 (a, b) and ZTT3 (c, d) and their N2 adsorption-desorption isotherm curves (e, f) and EDX spectra (g, h). Insets: The particle distribution histograms
